# Supplementary material
Source: PubMed Central journal article supplement (PMC5541864)
Supplement: 2017_171744-Disclosure.pdf [file 2017_171744-Disclosure.pdf]

Haematologica  
HAEMATOL/2017/171744  
Version 1

Long non-coding RNAs: Another brick in the wall of NK-AML?

Bruno C Medeiros

Disclosures: I have no conflicts to disclose regarding this contribution
